# Supplementary material for: Increased CD40 Expression Enhances Early STING-Mediated Type I Interferon Response and Host Survival in a Rodent Malaria Model
Source: PubMed Central journal article supplement (PMC5055354; doi:10.1371/journal.ppat.1005930), 2016-10-07
Supplement: ppat.1005930.s003.pdf [file ppat.1005930.s003.pdf]

## A. Amino acid sequence of mouse CD40 intracellular domain

VFLYIKKVVKKPKDNEILPPAARR**ODPOEMED**YPGHNTAA**PVOETI**LHGCO**PVTQEDGKESRI**ISVQERQVTDLSIALRPLV

TRAF6  
(Q238A; E239A)
TRAF2/3  
(T255A)
Box2  
(Q264A)

## B

|           |                                                                               |      |
|-----------|-------------------------------------------------------------------------------|------|
|           |                                                                               | mT6  |
| mT23      | GTC AAGAAACCAAAGGATAATGAGATCCTACCCCTGCGGCTCGACGGCAAGATCCCCAG                  |      |
| mT6       | GTC AAGAAACCAAAGGATAATGAGATCCTACCCCTGCGGCTCGACGGCAAGAT <b>CCCGCG</b>          |      |
| mTb2      | GTC AAGAAACCAAAGGATAATGAGATCCTACCCCTGCGGCTCGACGGCAAGATCCCCAG                  |      |
| mT23/6    | GTC AAGAAACCAAAGGATAATGAGATCCTACCCCTGCGGCTCGACGGCAAGAT <b>CCCGCG</b>          |      |
| mT6/b2    | GTC AAGAAACCAAAGGATAATGAGATCCTACCCCTGCGGCTCGACGGCAAGAT <b>CCCGCG</b>          |      |
| mT23/6/b2 | GTC AAGAAACCAAAGGATAATGAGATCCTACCCCTGCGGCTCGACGGCAAGAT <b>CCCGCG</b>          |      |
| CD40WT    | GTC AAGAAACCAAAGGATAATGAGATCCTACCCCTGCGGCTCGACGGCAAGATCCCCAG                  |      |
|           | *****                                                                         |      |
| mT6       |                                                                               | mT23 |
| mT23      | GAGATGGAAGATTATCCCGGTCATAACACCGCTGCT <b>CCAGTGCAGGAGCGCGTGCACGGG</b>          |      |
| mT6       | <b>GCGATGGAAGATTATCCCG</b> GTCATAACACCGCTGCTCCAGTGCAGGAGACGCTGCACGGG          |      |
| mTb2      | GAGATGGAAGATTATCCCGGTCATAACACCGCTGCTCCAGTGCAGGAGACGCTGCAC <b>CGGG</b>         |      |
| mT23/6    | <b>GCGATGGAAGATTATCCCG</b> GTCATAACACCGCTGCTCCAGTGCAGGAG <b>GCGCGTGCACGGG</b> |      |
| mTb6/b2   | <b>GCGATGGAAGATTATCCCG</b> GTCATAACACCGCTGCTCCAGTGCAGGAGACGCTGCACGGG          |      |
| mT23/6/b2 | <b>GCGATGGAAGATTATCCCG</b> GTCATAACACCGCTGCTCCAGTGCAGGAG <b>GCGCGTGCACGGG</b> |      |
| CD40WT    | GAGATGGAAGATTATCCCGGTCATAACACCGCTGCTCCAGTGCAGGAGACGCTGCACGGG                  |      |
|           | *****                                                                         |      |
|           | mTb2                                                                          |      |
| mT23      | <b>TGTCAGCCTGTCACACAGGAGGATGGTAAAGAGAGTCGCATCTCAGTGCAGGAGCGGCAG</b>           |      |
| mT6       | TGTCAGCCTGTCACACAGGAGGATGGTAAAGAGAGTCGCATCTCAGTGCAGGAGCGGCAG                  |      |
| mTb2      | <b>TGTCAGCCTGTCACAGCGGAGGATGGT</b> AAAGAGAGTCGCATCTCAGTGCAGGAGCGGCAG          |      |
| mT23/6    | TGTCAGCCTGTCACACAGGAGGATGGTAAAGAGAGTCGCATCTCAGTGCAGGAGCGGCAG                  |      |
| mT23/b2   | TGTCAGCCTGTCACA <b>GCGGAGGATGGT</b> AAAGAGAGTCGCATCTCAGTGCAGGAGCGGCAG         |      |
| mT23/6/b2 | TGTCAGCCTGTCACA <b>GCGGAGGATGGT</b> AAAGAGAGTCGCATCTCAGTGCAGGAGCGGCAG         |      |
| CD40WT    | TGTCAGCCTGTCACACAGGAGGATGGTAAAGAGAGTCGCATCTCAGTGCAGGAGCGGCAG                  |      |
|           | *****                                                                         |      |

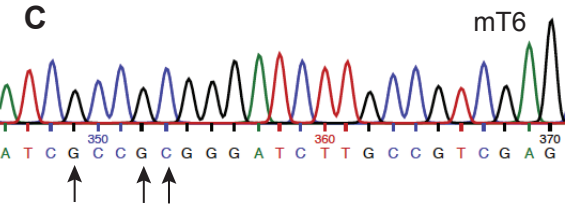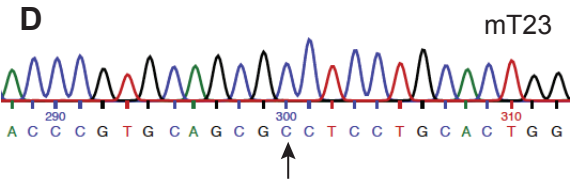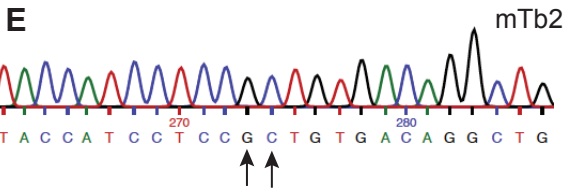

Flg S3
