# Supplementary material for: Increased CD40 Expression Enhances Early STING-Mediated Type I Interferon Response and Host Survival in a Rodent Malaria Model
Source: PubMed Central journal article supplement (PMC5055354; doi:10.1371/journal.ppat.1005930), 2016-10-07
Supplement: ppat.1005930.s004.pdf [file ppat.1005930.s004.pdf]

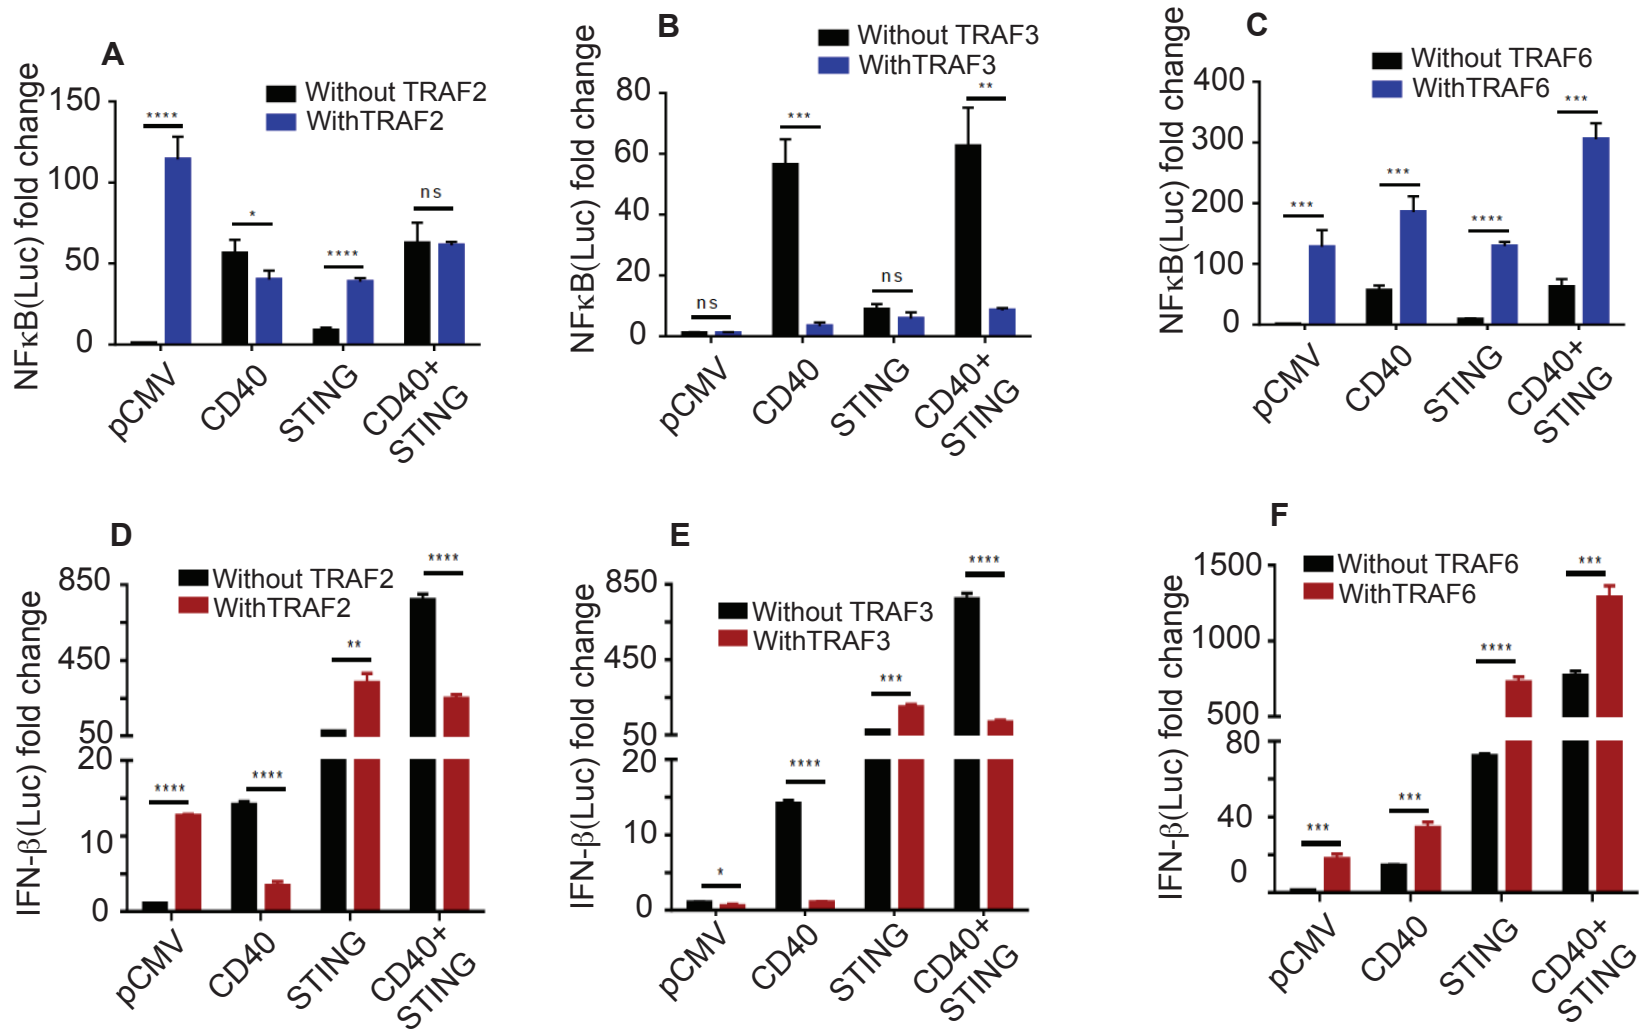

Fig S4
